13. Barzilai N, Gabriely I, Gabriely M, Iankowitz N, Sorkin JD. Offspring of centenarians have a favorable lipid profile. *J Am Geriatr Soc* 2001; 49: 76–9.
14. Terry DF, Evans JC, Pencina MJ *et al.* Characteristics of Framingham offspring participants with long-lived parents. *Arch Intern Med* 2007; 167: 438–44.
15. Shavelle R, Paculdo D. The effect of exceptional parental longevity on life expectancy. *J Am Geriatr Soc* 2012; 60: 1185.
16. Terry DF, Wilcox MA, McCormick MA *et al.* Lower all-cause, cardiovascular, and cancer mortality in centenarians' offspring. *J Am Geriatr Soc* 2004; 52: 2074–6.
17. Ayers E, Barzilai N, Crandall JP, Milman S, Verghese J. Association of family history of exceptional longevity with decline in physical function in aging. *J Gerontol A Biol Sci Med Sci* 2017; 72: 1649–55.
18. Ayers E, Barzilazi N, Crandall JP, Milman S, Verghese J. Association of exceptional parental longevity and physical function in aging. *Age* 2014; 36: 9677.
19. Lipton RB, Hirsch J, Katz MJ *et al.* Exceptional parental longevity associated with lower risk of Alzheimer's disease and memory decline. *J Am Geriatr Soc* 2010; 58: 1043–9.
20. Bucci L, Ostas R, Cevenini E *et al.* Centenarians' offspring as a model of healthy aging: a reappraisal of the data on Italian subjects and a comprehensive overview. *Aging* 2016; 8: 510–19.
21. The Women's Health Initiative Study Group. Design of the Women's Health Initiative clinical trial and observational study. *Control Clin Trials* 1998; 19: 61–109.
22. Sun Q, Townsend MK, Okereke OI, Franco OH, Hu FB, Grodstein F. Adiposity and weight change in mid-life in relation to healthy survival after age 70 in women: prospective cohort study. *BMJ* 2009; 339: b3796.
23. Rillamas-Sun E, LaCroix AZ, Waring ME *et al.* Obesity and late-age survival without major disease or disability in older women. *JAMA Intern Med* 2014; 174: 98–106.
24. Willcox BJ, He Q, Chen R *et al.* Midlife risk factors and healthy survival in men. *JAMA* 2006; 296: 2343–50.
25. Hays RD, Sherbourne CD, Mazel RM. The RAND 36-item health survey, 1.0. *Health Econ* 1993; 2: 217–27.
26. Centers for Disease Control and Prevention. Life expectancy. Available at <https://www.cdc.gov/nchs/fastats/life-expectancy.htm>. Accessed December 10, 2017.
27. Shadyab AH, Kooperberg C, Reiner AP *et al.* Replication of genome-wide association study findings of longevity in white, African American, and Hispanic women: The Women's Health Initiative. *J Gerontol A Biol Sci Med Sci* 2017; 72: 1401–6.
28. Pilling LC, Kuo CL, Sicinski K *et al.* Human longevity: 25 genetic loci associated in 389,166 UK biobank participants. *Aging* 2017; 9: 2504–20.
29. Kulminski A, Ukraintseva SV, Arbeevev KG *et al.* Association between APOE epsilon 2/epsilon 3/epsilon 4 polymorphism and disability severity in a national long-term care survey sample. *Age Ageing* 2008; 37: 288–93.
30. Verghese J, Holtzer R, Wang C, Katz MJ, Barzilai N, Lipton RB. Role of APOE genotype in gait decline and disability in aging. *J Gerontol A Biol Sci Med Sci* 2013; 68: 1395–1401.

Received 14 April 2018; editorial decision 2 July 2018

*Age and Ageing* 2018; 47: 860–866

doi: 10.1093/ageing/afy128

Published electronically 27 August 2018

© The Author(s) 2018. Published by Oxford University Press on behalf of the British Geriatrics Society. All rights reserved. For permissions, please email: [journals.permissions@oup.com](mailto:journals.permissions@oup.com)

## Happy older people live longer

CHOY-LYE CHEI<sup>1,2</sup>, JUNE MAY-LING LEE<sup>2</sup>, STEFAN MA<sup>3</sup>, RAHUL MALHOTRA<sup>1,2</sup>

<sup>1</sup>Health Services and Systems Research, Duke-NUS Medical School, 169857, Singapore

<sup>2</sup>Centre for Ageing Research and Education, Duke-NUS Medical School, 169857, Singapore

<sup>3</sup>Epidemiology & Disease Control Division, Singapore Ministry of Health, 169854, Singapore

Address correspondence to: Rahul Malhotra, Tel: +(65) 6516 6721; Fax: +(65) 6534 8632.

E-mail: [rahul.malhotra@duke-nus.edu.sg](mailto:rahul.malhotra@duke-nus.edu.sg)

### Abstract

**Objective:** research on the role of positive affect, such as happiness, on health outcomes is burgeoning. Within this context, evidence for an inverse effect of happiness on mortality is inconclusive. Furthermore, few studies link happiness with mortality among older people, and in Asian populations. We examine the association between happiness and all-cause mortality among older people in Singapore.

**Methods:** data for 4,478 Singaporeans aged  $\geq 60$  years enrolled in a nationally-representative longitudinal survey (three waves: 2009; 2011; 2015) were utilised. Happiness, at baseline, in 2009, was measured using three positively-worded items from the Centre for Epidemiological Studies Depression Scale, and considered in two distinct ways in the analyses—continuous ('happiness score' [0–6]) and binary (happy [score = 6]/unhappy). All-cause mortality, until 31 December 2015, was

assessed primarily using administrative databases, supplemented by data from survey waves 2 and 3. Multivariable Cox regression models assessed the association of ‘happiness score’ and the ‘binary happiness variable’ (separate models for each) with all-cause mortality.

**Results:** the likelihood of all-cause mortality was lower by 9% (multivariable hazard ratio (HR) [95% confidence interval]: 0.91 [0.87–0.95]) for each unit increase in ‘happiness score’, and was 19% lower for happy, versus unhappy, older people (HR: 0.81 [0.68–0.97]).

**Conclusions:** happiness is associated with reduced likelihood of all-cause mortality among older people in an Asian population, with the benefit observed even for incremental increases in happiness. Activities, policies and programs that maintain or improve happiness may be beneficial for a longer life among older people.

**Keywords:** *happiness, mortality, aged, Asia, older people.*

## Introduction

There is a growing interest in the role that positive affect plays in improving population health [1]. Many studies report positive affect to be associated with better health outcomes, such as lower mortality, reduced morbidity and functional independence, in both community-dwelling and clinical populations [2–10]. However, evidence for an inverse effect of happiness, a form of positive affect, on mortality is inconclusive [2, 6–9, 11–14].

The key to the inconsistency in the association of happiness with mortality is the variability in controlling for confounders across studies. For example, in a study of over 700,000 English and Scottish women, the association between happiness and mortality was not seen after adjustment for socio-demographic, lifestyle and health factors [2]. Similarly, a 15-year follow-up study of 861 Dutch older persons aged 65–85 years observed that the inverse link between happiness and mortality was not statistically significant after adjustment for physical activity and prevalent morbidity [8]. Furthermore, in studies that report this association, psychosocial variables, such as loneliness [15] and social networks [16], which are potential confounders, are frequently not accounted for [2, 7–9, 11].

Another limitation of existing studies on happiness and mortality is the generalisability of their findings only to certain populations. Firstly, only a few studies have focused exclusively on older people [8, 13], i.e. individuals aged 60 years or older. Secondly, most of the studies that do report the association of interest are from Western countries, hence, constraining the findings to this socio-cultural context. Cross-cultural research suggests that the value and consequences of happiness may differ across cultures [17]. For instance, East Asians are more inclined than Westerners to think that it is not appropriate to express happiness in many social situations [17]. Another study found that positive emotions were associated with depressive symptoms among European Americans and Asian Americans but not immigrant Asians [18]. Therefore, studying the association of happiness with mortality among

older people in an Asian country would expand the scope of the extant literature examining this association.

In addressing the above mentioned limitations, we assessed if happiness is associated with all-cause mortality in a nationally-representative sample of older people in Singapore, a Southeast Asian nation. Furthermore, given the variability in the associations of positive affect with mortality by age [5, 19] and by sex [20], we investigated if age or sex moderate the association between happiness and all-cause mortality.

## Method

### Study design and participants

Data from a nationally-representative longitudinal survey (Panel on Health and Ageing among Singaporean Elderly [PHASE]; Wave 1 in 2009, Wave 2 in 2011–2012 and Wave 3 in 2015) of community-dwelling older people in Singapore, combined with information on their date of death, until 31 December 2015, from the national Registry of Births and Deaths databases, were utilised. Details of Wave 1 are available elsewhere [21]—briefly, 4,990 Singapore citizens and permanent residents aged 60 years or older living at home (or their proxy respondents, if unable to respond due to health reasons) were surveyed. Of these, 3,103 and 1,572 participants were re-interviewed at Waves 2 and 3, respectively. The Institutional Review Board at the National University of Singapore ethics approved the longitudinal survey and matching with the deaths databases. Our analytical sample was restricted to 4,478 of the 4,990 Wave 1 participants, after sequentially excluding those with: (1) missing value for happiness ( $n = 460$ ; participants unable to respond themselves due to their ill-health had a proxy respondent, who did not answer the items on happiness), (2) severe cognitive impairment ( $n = 9$ ; score > seven on the Short Portable Mental Status Questionnaire [22]; uncertainty of self-report of happiness) and (3) mortality within 6 months of their Wave 1 interview ( $n = 43$ ; confounding due to asymptomatic life-limiting diseases).

## Happiness

Happiness is better assessed using the frequency, than intensity, of a positive affect [23]. At Wave one, participants were asked how often in the past week (Never or Rarely: 0; Sometimes: 1; Often: 2) they experienced the following: 'I felt happy', 'I enjoyed life' and 'I felt hope about the future', using a 12-item version of the Centre for Epidemiological Studies Depression Scale (CES-D) [24]. Previous studies have used the 'positive' items from the CES-D to measure happiness specifically [16], and positive affect in general [4, 10, 25, 26]. While most of these studies use four positive items from the CES-D, the 12-item CES-D used in PHASE did not include the item 'I felt I was just as good as other people'. Exploratory factor analysis of the 12-item CES-D scale, verifying the structural validity of grouping the three items in our data, supported a 2-factor model, with the three items having factor loadings  $\geq 0.5$  for a common factor (not shown; available on request).

A review of studies linking positive psychological well-being with mortality suggested that findings vary with how the variable for well-being is considered in the analysis [3]. Thus, to check the robustness of our association of interest, we operationalised happiness in two distinct ways: (1) a continuous 'happiness score' (sum of scores on the three items; range: 0–6; higher value indicates a greater extent of happiness), and (2) a 'binary happiness variable' (happy [happiness score = 6]/unhappy [happiness score  $\leq 5$ ]). In sensitivity analysis, detailed in Appendix 1, available in *Age and Ageing* online, we operationalised happiness in alternate ways, such as using an alternative cut-off ( $\geq 5$ ) for the 'binary happiness variable'.

## All-cause mortality

We assessed all-cause mortality, until 31 December 2015, using the national Registry of Births and Deaths databases, supplemented by data collected during survey Waves 2 and 3.

## Confounders

Our analysis controlled for a range of demographic, lifestyle, health and social variables of participants at Wave 1 (details of confounders are presented in Appendix 2, available in *Age and Ageing* online).

## Statistical analysis

The confounders were summarised with sampling weights, by 'binary happiness variable' (happy/unhappy) and all-cause mortality until 31 December 2015 (alive/dead). We assessed the statistical significance of differences, across happy/unhappy and across alive/dead, using student's *t*-test and chi-square test for continuous and categorical variables, respectively. Kaplan–Meier estimates were used to generate unadjusted survival curves by 'binary happiness variable'; the two curves were compared using the log-rank test.

Univariable and multivariable (adjusting for all confounders) associations (hazard ratios [HR] and associated 95% confidence intervals [CI]) of the 'happiness score' and the 'binary happiness variable' with all-cause mortality were assessed using Cox regression analysis. In the multivariable models, we introduced cross-product terms for age (as 60–74/ $\geq 75$ ) and sex with the happiness variable to assess for moderation; the terms were retained only if they were significant. Finally, we tested for a non-linear association between 'happiness score' and all-cause mortality using restricted cubic splines with four knots in multivariable Cox regression analysis; the first knot (score = 0) was used as the reference. In sensitivity analysis, the multivariable association of the alternative operationalisations of happiness with all-cause mortality were assessed. All analyses were performed using the SAS statistical package version 9.4 (Statistical Analysis System Inc., Cary, NC), except for the restricted cubic spline plots, which were fitted in Stata version 14 (Stata Corporation, College Station, Texas, USA). A *P*-value of  $< 0.05$  was considered statistically significant.

## Results

The average follow-up duration was  $6.2 \pm 1.4$  years, and the average 'happiness score' was  $4.16 \pm 1.66$ . Of the 4,478 older people in the analytical sample, 1,486 (33.2%) were happy. All considered confounders, except body mass index category, were associated with the 'binary happiness variable'. A total of 813 (18.2%) participants died until 31 December 2015. Again, all considered confounders were associated with all-cause mortality (Appendix 3, available in *Age and Ageing* online).

Among the 1,486 happy older people, a total of 217 (14.6%) deaths were observed until 31 December 2015. The corresponding proportion was higher (19.9%;  $n = 596$ ) among the 2,992 unhappy older people. There was a significant difference in the unadjusted survival curves between happy and unhappy older people (log-rank test  $P < 0.001$ );

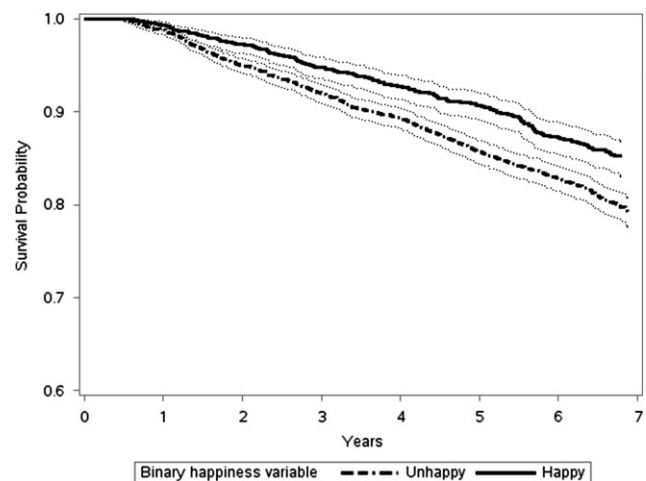

**Figure 1.** Kaplan–Meier survival curves (with 95% Confidence Limits) by 'binary happiness variable' (Happy/Unhappy).

**Table 1.** Association of ‘binary happiness variable’ and ‘happiness score’ with all-cause mortality, Cox regression analysis

|                                                  | Binary happiness variable |                     | For each unit increase in ‘happiness score’ |
|--------------------------------------------------|---------------------------|---------------------|---------------------------------------------|
|                                                  | Unhappy                   | Happy               |                                             |
| Univariable hazard ratio (95% CI)                | Reference                 | 0.71 (0.61-0.83)*** | 0.89 (0.85-0.93)***                         |
| Multivariable hazard ratio (95% CI) <sup>a</sup> | Reference                 | 0.81 (0.68-0.97)*   | 0.91 (0.87-0.95)***                         |

CI: Confidence Interval.

\* $P < 0.05$ , \*\*\* $P < 0.001$ .

<sup>a</sup>Adjusted for demographic (age, sex, ethnicity, marital status, housing type, educational status and living arrangement), lifestyle (physical activity, smoking status, alcohol intake and sleep duration), health (body mass index category, self-rated health, number of chronic diseases, number of activity of daily living limitations, number of instrumental activity of daily living limitations, number of mobility limitations, depressive symptoms and cognitive impairment status) and social (loneliness and social networks) variables—multivariable hazard ratios for the covariates are provided in Supplementary Table 3, available in *Age and Ageing* online.

the curve for happy older people was higher through the follow-up (Figure 1).

Cox regression analysis revealed a significant inverse association of happiness with all-cause mortality. Compared to unhappy older people, those happy had a 19% reduced likelihood of all-cause mortality (multivariable HR [95% CI]: 0.81 [0.68–0.97]). Further, for each unit increase in ‘happiness score’, the likelihood of all-cause mortality was reduced by 9% (multivariable HR [95% CI]: 0.91 [0.87–0.95]) (Table 1 and Appendix 4, available in *Age and Ageing* online). In either multivariable analysis, the cross-product terms for age and sex with the variable for happiness were not significant. The linear association of ‘happiness score’ with the likelihood of all-cause mortality was confirmed by the restricted cubic spline regression ( $P$ -value for non-linearity = 0.87) (Appendix 5, available in *Age and Ageing* online). Inverse associations of happiness with all-cause mortality were also observed in the sensitivity analysis (Appendix 1, available in *Age and Ageing* online).

## Discussion

Happy older people live longer. We observed happiness to be associated with reduced likelihood of all-cause mortality among older people. The association was consistent regardless of whether happiness was defined as a continuous or a binary variable, observed even after adjusting for a range of demographic, lifestyle, health and social variables. Furthermore, the association did not vary by age or by sex, and was present even when happiness was operationalised alternatively in our sensitivity analysis. Our finding not only supports the growing literature linking happiness with lower mortality [7, 9, 11], but also extends it to older people and Asian populations. In fact, we posit that the true association of happiness with mortality may even be stronger than observed in our study; given reports of the limited expression of happiness among East Asians [17], it is possible that the extent of happiness was underreported by our study participants, resulting in estimates that are closer to the null.

While acknowledging the presence of a bi-directional relationship of happiness with health and lifestyle factors, the potential pathways that link happiness with a reduced

likelihood of mortality could be through improved physical and mental health as well as maintenance of a healthy lifestyle, such as adequate sleep and physical activity [5, 27]. The theorised underlying physiological or biological mechanisms include those involving cardiovascular function, immunologic function and hypothalamic–pituitary–adrenal axis [5]. Many of the proposed biological mechanisms are based on experimental studies that artificially manipulated positive affect in laboratory settings; studies that examine if such controlled changes in positive affect are mirrored in real-world settings are warranted [5].

The variability in the conceptualisation and measurement of happiness make it difficult to directly compare the association of happiness with health outcomes across studies. For example, happiness has been conceptualised to comprise evaluative well-being (e.g. life satisfaction), hedonic well-being (e.g. everyday feelings or mood, such as happiness) and eudemonic well-being (e.g. meaning and purpose of life) [28]. Likewise, there are several approaches for measuring happiness, the common ones being the use of all or a subset of questions of a structured well-being scale [8, 11], positive items on the CES-D scale [4, 10, 19, 25, 26, 29] and single-item scales [2, 9]. For reasons stated in the Method section, we measured happiness using three positive items on the CES-D scale. Nonetheless, given concerns that these items may not be solely assessing happiness but also tapping into other constructs, such as optimism [5], we performed sensitivity analyses to separately examine the association of the items representing hedonic happiness (‘I felt happy’, ‘I enjoyed life’) and hope (‘I felt hope about the future’) on all-cause mortality, and found similar inverse associations with mortality in these analyses.

Compared to the six studies that have assessed the association of the positive items on the CES-D scale with mortality, our observed findings are largely similar [4, 10, 19, 25, 26, 29]. Two of the studies, among older persons, observed an inverse association of the positive items on the CES-D scale with mortality in their entire sample [4, 25], while two more observed it only in sub-populations, such as older persons aged 61–80 years and persons with diabetes [10, 19]. A recent study observed the inverse relationship among older persons before controlling for other subjective health measures, such as quality of life [26]. Only one study, not



exclusive to older persons, reported a null finding [29]. Thus, studies on older persons have consistently found an inverse association between positive affect, as measured on the CES-D scale, with mortality. This suggests that older persons may especially benefit from increases in positive effect.

Our study finding, coupled with findings from previous studies demonstrating ways to enhance happiness [30, 31], has implications for both older people and policymakers striving to increase life expectancy. At an individual level, older people may have longevity benefits through participating in activities shown to increase happiness or psychological well-being—such as expressing gratitude, a daily focus on the ‘good’ things that happen to them through the day, and identifying and utilising one’s strength of character [30, 31]. Suggestions for policymakers to help individuals live happier lives include promotion of community engagement, encouragement of strong social networks, provision of a decent material standard of living, fostering of freedom and democracy, and good governance [9, 12].

Our study has several strengths. In addition to our focus on older people residing in an Asian country, our inclusion of a wide range of confounders is a key strength. An important limitation in previous studies is the exclusion or inadequate measurement of health-related confounders in analyses linking happiness and mortality [2]. To counter this, we controlled for several health and health-risk (lifestyle) variables. We also controlled for psychosocial variables of loneliness [15] and social networks [16], which are not often considered in most studies [2, 7–9, 11]. Other strengths include the use of a nationally-representative sample and the comprehensive assessment of mortality using national administrative databases.

The study also has its limitations. Firstly, physical activity was operationalised through a simple question (whether respondents go for a walk for exercise purposes), suggesting the possibility of residual confounding by physical activity status. However, inclusion of questions on limitations in mobility, activities of daily living (ADLs) and instrumental ADLs would have likely reduced such residual confounding. Secondly, except for most of the demographic variables, adjusting for the lifestyle, health and social variables may be considered as over-adjusting given their potential to be on the causal pathway between happiness and mortality. For example, happiness affects health, and good health has found to predict subsequent positive affect [28]. However, for many of the variables, such as physical activity, alcohol intake and social networks, empirical data suggests their causal association with feelings of happiness [32–35] and with mortality [36–38]. Thus, we adjusted for them as confounders. Thirdly, while we attempt to mitigate unmeasured confounding either due to undiagnosed or unreported life-limiting health conditions or due to lack of information on severity of known health conditions by excluding deaths within six months of the baseline interview, we do acknowledge the presence of residual confounding. Fourthly, we did not have access to data on the cause of death from the

administrative databases, thus, we are unable to examine the association of happiness with cause-specific mortality. Fifthly, we had a relatively short follow-up term for our cohort; it will be of interest to see if the associations are maintained in the long-term. Similarly, we were only able to consider the baseline status of happiness. Larger studies, with longer follow-up durations should explore the association of change in happiness with mortality. Finally, we assessed chronic diseases through the self-report of ever-diagnosis by a medical professional, which may underestimate the number of chronic diseases. However, given the high rates of screening for chronic diseases in Singapore [39], the undetected number of chronic diseases is unlikely to be large.

In conclusion, happy older people live longer. Given our finding of a linear association between happiness and reduced all-cause mortality, even small increments in happiness may be beneficial for older people. Activities, policies and programs that maintain or improve happiness may contribute to a longer life among older people.

---

## Key points

- Only few existing studies linking happiness with reduced mortality focus exclusively on older people. Further, all studies reporting this link are from Western countries.
  - This study is the first to report this link in a representative sample of older people residing in Singapore, an Asian country.
  - Happiness is associated with reduced likelihood of all-cause mortality among older Singaporeans.
  - The benefit is observed even for incremental increases in happiness.
- 

## Supplementary data

Supplementary data mentioned in the text are available to subscribers in *Age and Ageing* online.

## Acknowledgements

We thank Mary Ann C. Bautista for her assistance in editing the final draft of the manuscript.

## Conflicts of interest

None.

## Funding

Waves 1, 2 and 3 of the Panel on Health and Ageing among Singaporean Elderly (PHASE) have been funded or supported by the following sources: Ministry of Social and Family Development, Singapore; Singapore Ministry of Health’s National Medical Research Council under its Singapore Translational Research Investigator Award

'Establishing a Practical and Theoretical Foundation for Comprehensive and Integrated Community, Policy and Academic Efforts to Improve Dementia Care in Singapore' (NMRC-STAR-0005-2009), and its Clinician Scientist—Individual Research Grant—New Investigator Grant 'Singapore Assessment for Frailty in Elderly—Building upon the Panel on Health and Aging of Singaporean Elderly' (NMRC-CNIG-1124-2014); and Duke-NUS Geriatric Research Fund. The content including the methods, findings and results are solely the authors' responsibility and do not represent the endorsement and views of the funding sources.

## References

1. Pennock M, Ura K. Gross national happiness as a framework for health impact assessment. *Environ Impact Assess Rev* 2011; 31: 61–5.
2. Liu B, Floud S, Pirie K *et al*. Does happiness itself directly affect mortality? The prospective UK Million Women Study. *Lancet* 2016; 387: 874–81.
3. Chida Y, Steptoe A. Positive psychological well-being and mortality: a quantitative review of prospective observational studies. *Psychosom Med* 2008; 70: 741–56.
4. Ostir GV, Markides KS, Black SA, Goodwin JS. Emotional well-being predicts subsequent functional independence and survival. *J Am Geriatr Soc* 2000; 48: 473–8.
5. Pressman SD, Cohen S. Does positive affect influence health? *Psychol Bull* 2005; 131: 925–71.
6. Diener EC, Happy MY. people live longer: subjective well-being contributes to health and longevity. *Appl Psychol* 2011; 3: 1–43.
7. Guven C, Saloumidis R. Why is the World Getting Older? The Influence of Happiness on Mortality (June 2009). SOEPpaper No 198 Available at SSRN: <https://ssrn.com/abstract=1422489> or <http://dx.doi.org/10.2139/ssrn.1422489>.
8. Koopmans TA, Geleijnse JM, Zitman FG, Giltay EJ. Effects of happiness on all-cause mortality during 15 years of follow-up: the Arnhem Elderly Study. *J Happiness Stud* 2010; 11: 111–24.
9. Lawrence EM, Rogers RG, Wadsworth T. Happiness and longevity in the United States. *Soc Sci Med* 2015; 145: 115–9.
10. Moskowitz JT, Epel ES, Acree M. Positive affect uniquely predicts lower risk of mortality in people with diabetes. *Health Psychol* 2008; 27: S73–82.
11. Carstensen LL, Turan B, Scheibe S *et al*. Emotional experience improves with age: evidence based on over 10 years of experience sampling. *Psychol Aging* 2011; 26: 21–33.
12. Veenhoven R. Healthy happiness: effects of happiness on physical health and the consequences for preventive health care. *J Happiness Stud* 2008; 9: 449–69.
13. Kawamoto R, Doi T. Self-reported functional ability predicts three-year mobility and mortality in community-dwelling older persons. *Geriatrics and Gerontology International* 2002; 2: 68–74.
14. Danner DD, Snowdon DA, Friesen WV. Positive emotions in early life and longevity: findings from the nun study. *J Pers Soc Psychol* 2001; 80: 804–13.
15. Newall NE, Chipperfield JG, Bailis DS, Stewart TL. Consequences of loneliness on physical activity and mortality in older adults and the power of positive emotions. *Health Psychol* 2013; 32: 921–4.
16. Fowler JH, Christakis NA. Dynamic spread of happiness in a large social network: longitudinal analysis over 20 years in the Framingham Heart Study. *BMJ* 2008; 337: a2338.
17. Joshanloo M, Weijers D. Aversion to happiness across cultures: a review of where and why people are averse to happiness. *J Happiness Stud* 2014; 15: 717–35.
18. Leu J, Wang J, Koo K. Are positive emotions just as 'positive' across cultures? *Emotion* 2011; 11: 994–9.
19. Krijthe BP, Walter S, Newson RS, Hofman A, Hunink MG, Tiemeier H. Is positive affect associated with survival? A population-based study of elderly persons. *Am J Epidemiol* 2011; 173: 1298–307.
20. Shirai K, Iso H, Ohira T *et al*. Perceived level of life enjoyment and risks of cardiovascular disease incidence and mortality: the Japan public health center-based study. *Circulation* 2009; 120: 956–63.
21. Malhotra C, Chan A, Malhotra R, Ostbye T. Fifteen dimensions of health among community-dwelling older Singaporeans. *Curr Gerontol Geriatr Res* 2011; 2011: 128581.
22. Pfeiffer E. A short portable mental status questionnaire for the assessment of organic brain deficit in elderly patients. *J Am Geriatr Soc* 1975; 23: 433–41.
23. Diener E, Sandvik E, Pavot W. Happiness is the Frequency, Not the Intensity, of Positive Versus Negative Affect. In: Diener E, ed. *Assessing Well-Being: The Collected Works of Ed Diener*. Dordrecht: Springer Netherlands, 2009; pp. 213–31.
24. Kohout FJ, Berkman LF, Evans DA, Cornoni-Huntley J. Two shorter forms of the CES-D (Center for Epidemiological Studies Depression) depression symptoms index. *J Aging Health* 1993; 5: 179–93.
25. Blazer DG, Hybels CF. What symptoms of depression predict mortality in community-dwelling elders? *J Am Geriatr Soc* 2004; 52: 2052–6.
26. Sajjad A, Freak-Poli RL, Hofman A, Roza SJ, Ikram MA, Tiemeier H. Subjective measures of health and all-cause mortality - the Rotterdam Study. *Psychol Med* 2017; 47: 1971–80.
27. Boehm JK, Kubzansky LD. The heart's content: the association between positive psychological well-being and cardiovascular health. *Psychol Bull* 2012; 138: 655–91.
28. Steptoe A, Deaton A, Stone AA. Subjective wellbeing, health, and ageing. *Lancet* 2015; 385: 640–8.
29. Ortega FB, Lee DC, Sui X *et al*. Psychological well-being, cardiorespiratory fitness, and long-term survival. *Am J Prev Med* 2010; 39: 440–8.
30. Bolier L, Haverman M, Westerhof GJ, Riper H, Smit F, Bohlmeijer E. Positive psychology interventions: a meta-analysis of randomized controlled studies. *BMC Public Health* 2013; 13: 119.
31. Seligman ME, Steen TA, Park N, Peterson C. Positive psychology progress: empirical validation of interventions. *Am Psychol* 2005; 60: 410–21.
32. Geiger BB, MacKerron G. Can alcohol make you happy? A subjective wellbeing approach. *Soc Sci Med* 2016; 156: 184–91.
33. Parackal M, Parackal S. Implication of alcohol consumption on aggregate wellbeing. *Perspect Public Health* 2017; 137: 220–6.
34. Wang F, Orpana HM, Morrison H, de Groh M, Dai S, Luo W. Long-term association between leisure-time physical activity and changes in happiness: analysis of the Prospective

- National Population Health Survey. *Am J Epidemiol* 2012; 176: 1095–100.
35. Chan YK, Lee RP. Network size, social support and happiness in later life: a comparative study of Beijing and Hong Kong. *J Happiness Stud* 2006; 7: 87–112.
36. Shiroma EJ, Lee IM. Physical activity and cardiovascular health: lessons learned from epidemiological studies across age, gender, and race/ethnicity. *Circulation* 2010; 122: 743–52.
37. Thun MJ, Peto R, Lopez AD *et al.* Alcohol consumption and mortality among middle-aged and elderly U.S. adults. *N Engl J Med* 1997; 337: 1705–14.
38. Shye D, Mullooly JP, Freeborn DK, Pope CR. Gender differences in the relationship between social network support and mortality: a longitudinal study of an elderly cohort. *Soc Sci Med* 1995; 41: 935–47.
39. Wong HZ, Lim WY, Ma SS, Chua LA, Heng DM. Health screening behaviour among Singaporeans. *Ann Acad Med Singapore* 2015; 44: 326–34.

Received 10 November 2017; editorial decision 8 June 2018

*Age and Ageing* 2018; **47**: 866–871  
doi: 10.1093/ageing/afy136  
Published electronically 17 August 2018

© The Author(s) 2018. Published by Oxford University Press on behalf of the British Geriatrics Society. All rights reserved. For permissions, please email: journals.permissions@oup.com

# Do people with Alzheimer’s disease improve with repeated testing? Unpacking the role of content and context in retest effects

ALDEN L. GROSS<sup>1,2</sup>, NADIA CHU<sup>1,2</sup>, LORETTA ANDERSON<sup>3</sup>, M. MARIA GLYMOUR<sup>4</sup>, RICHARD N. JONES<sup>5</sup>, FOR THE COALITION AGAINST MAJOR DISEASES\*

<sup>1</sup>Department of Epidemiology, Johns Hopkins Bloomberg School of Public Health, Baltimore, MD 21205, USA

<sup>2</sup>Johns Hopkins University Center on Aging and Health, Baltimore, MD 21205, USA

<sup>3</sup>Department of Mental Health, Johns Hopkins Bloomberg School of Public Health, Baltimore, MD 21205, USA

<sup>4</sup>Departments of Epidemiology and Biostatistics, University of California, San Francisco, CA 94158, USA

<sup>5</sup>Departments of Psychiatry and Human Behavior and Neurology, Warren Alpert Medical School, Brown University, Providence, RI 02903, USA

Address correspondence to: Dr Alden Gross, Department of Epidemiology, Johns Hopkins Bloomberg School of Public Health, 2024 E. Monument Street, Baltimore, MD 21205, USA. E-mail: [agross14@jhu.edu](mailto:agross14@jhu.edu)

\*Data used in the preparation of this article were obtained from the Coalition Against Major Diseases (CAMD) database. In 2008, Critical Path Institute, in collaboration with the Engelberg Center for Health Care Reform at the Brookings Institution, formed the Coalition Against Major Diseases (CAMD). The Coalition brings together patient groups, biopharmaceutical companies, and scientists from academia, the US Food and Drug Administration (FDA), the European Medicines Agency (EMA), the National Institute of Neurological Disorders and Stroke (NINDS) and the National Institute on Aging (NIA). The Coalition Against Major Diseases (CAMD) includes over 200 scientists from member and non-member organizations. The data available in the CAMD database has been volunteered by CAMD member companies and non-member organizations.

## Abstract

**Objective:** retest effects may be attributed to ‘repeated content’ in neuropsychological tests such as words in word list-learning tests, or the ‘testing context’ which involves procedural memory and reduced test anxiety following repeated administration. Alzheimer’s Disease (AD) severely impairs episodic memory, so longitudinal cognitive testing among people with dementia may reveal the relative contributions of content versus context to retest effects in neuropsychological testing.

**Method:** we used data from the Critical Path Institute’s repository of placebo arm data from randomized controlled trials (RCTs) of dementia conducted by participating pharmaceutical companies ( $N = 990$  people, 4,170 study visits, up to 2.4 years of follow-up). To estimate retest effects on the Mini-Mental State Examination (MMSE), we used linear regressions with random effects for people and time, adjusting for age, sex and race, and longitudinal quantile regressions.
